# Supplementary material
Source: Oxford University Press journal article supplement (https://arvo.silverchair-cdn.com/arvo/content_public/journal/iovs/933240/huangsupplementaryfigs3.pdf)
Supplement: Supplementary file 1 [file huangsupplementaryfigs3.pdf]

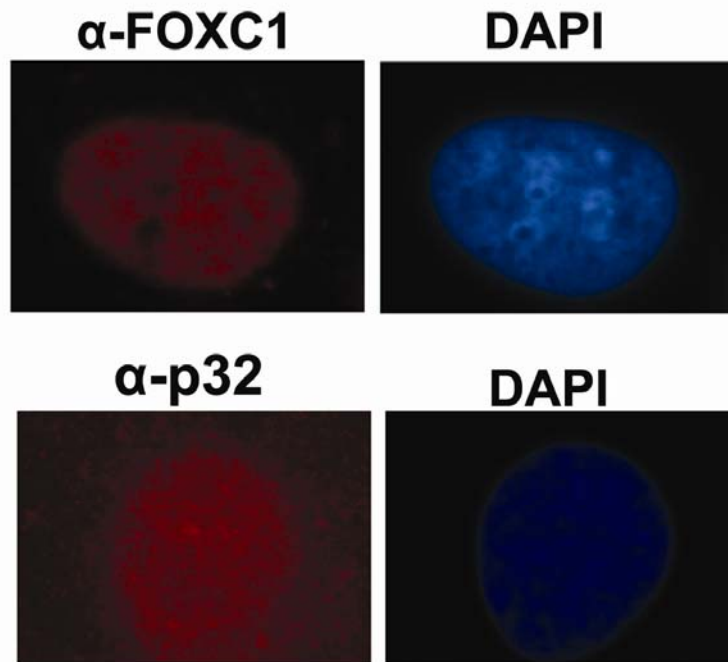

### Supplementary Figure 3

**Supplementary Figure S3.** Cellular localization of endogenous FOXC1 and p32. *Upper panel:* In the nucleus of a HTM cell, endogenous FOXC1 was stained with a goat polyclonal anti-FOXC1 antibody followed by Alexa Fluor 594 conjugated anti-goat secondary antibody (left). The same nucleus was stained with DAPI (right). *Lower panel:* In the nucleus of a HTM cell, endogenous p32 was stained as described above (left). The same nucleus was stained with DAPI (right).
